# Supplementary material
Source: Royal Society of Chemistry journal article supplement (doi:10.1039/d6cp00892e)
Supplement: d6cp00892e1.pdf [file d6cp00892e1.pdf]

Figure S1. The phonon spectra of (a) monolayer graphene and (b) CoNG are presented

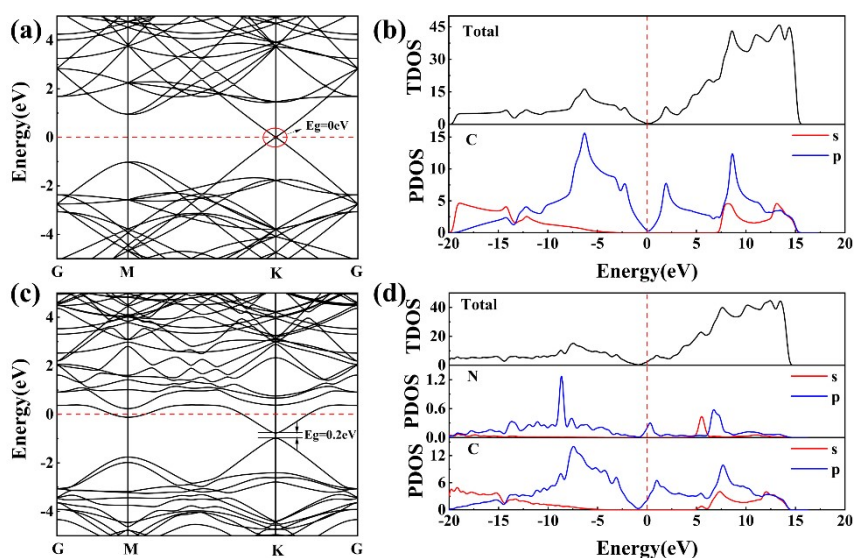

Figure S2. The electronic band structure and density of states of (a)-(b) monolayer graphene and (c)-(d) N-doped graphene are presented

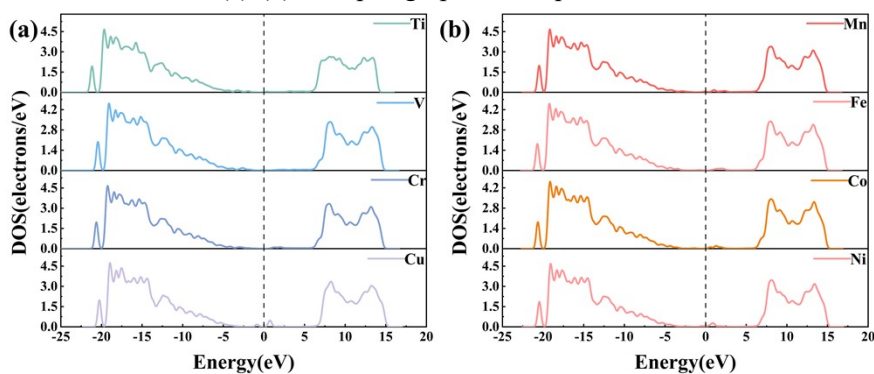

Figure S3. Density of states of C 2s in each doped system

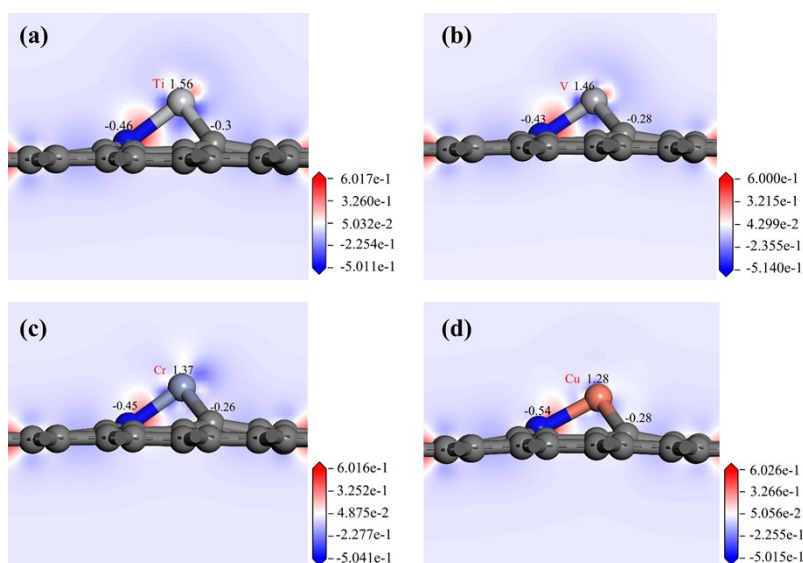

Figure S4. Charge difference density and Mulliken diagrams; (a) Ti; (b) V; (c) Cr; (d) Cu

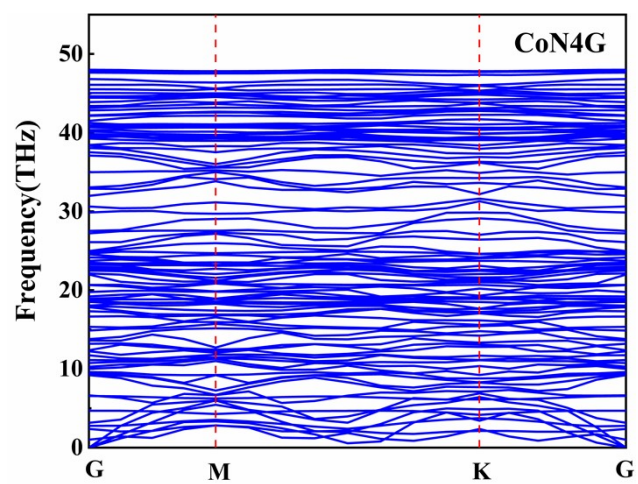

Figure S5. Phonon spectrum of  $\text{CoN}_4\text{G}$

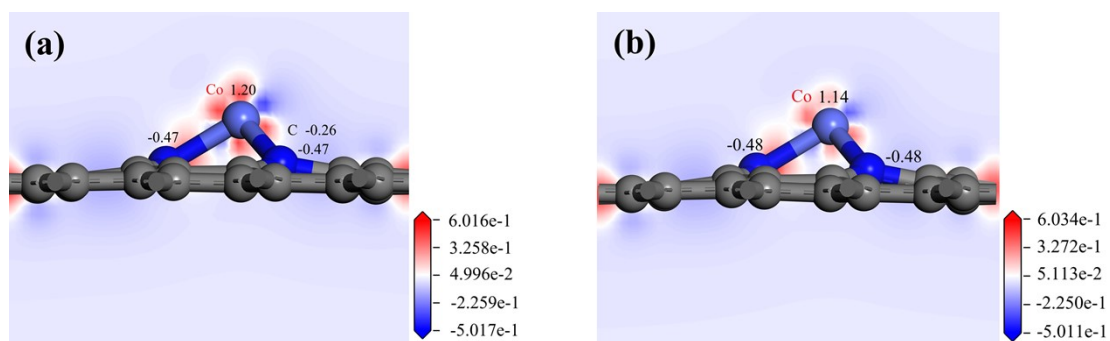

Figure S6. Charge difference density and Mulliken diagrams; (a)  $\text{CoN}_2\text{G}$ , (b)  $\text{CoN}_3\text{G}$
